# Supplementary material for: Inflammation Mediates Platinum-Based Chemotherapy-Induced Risk of Adverse Cardiac Events in Older NSCLC Patients: A Pilot Study
Source: Research Square preprint supplement (doi:10.21203/rs.3.rs-7327742/v1), 2025-09-03
Supplement: Supplementary file 1 [file 8f7e224cdf78cc48ccefde84.docx]

**Supplemental Materials**

**Figures**

**Figure S1:** The NLR spatiotemporal pattern representation for four randomly-selected patients from our study cohort.


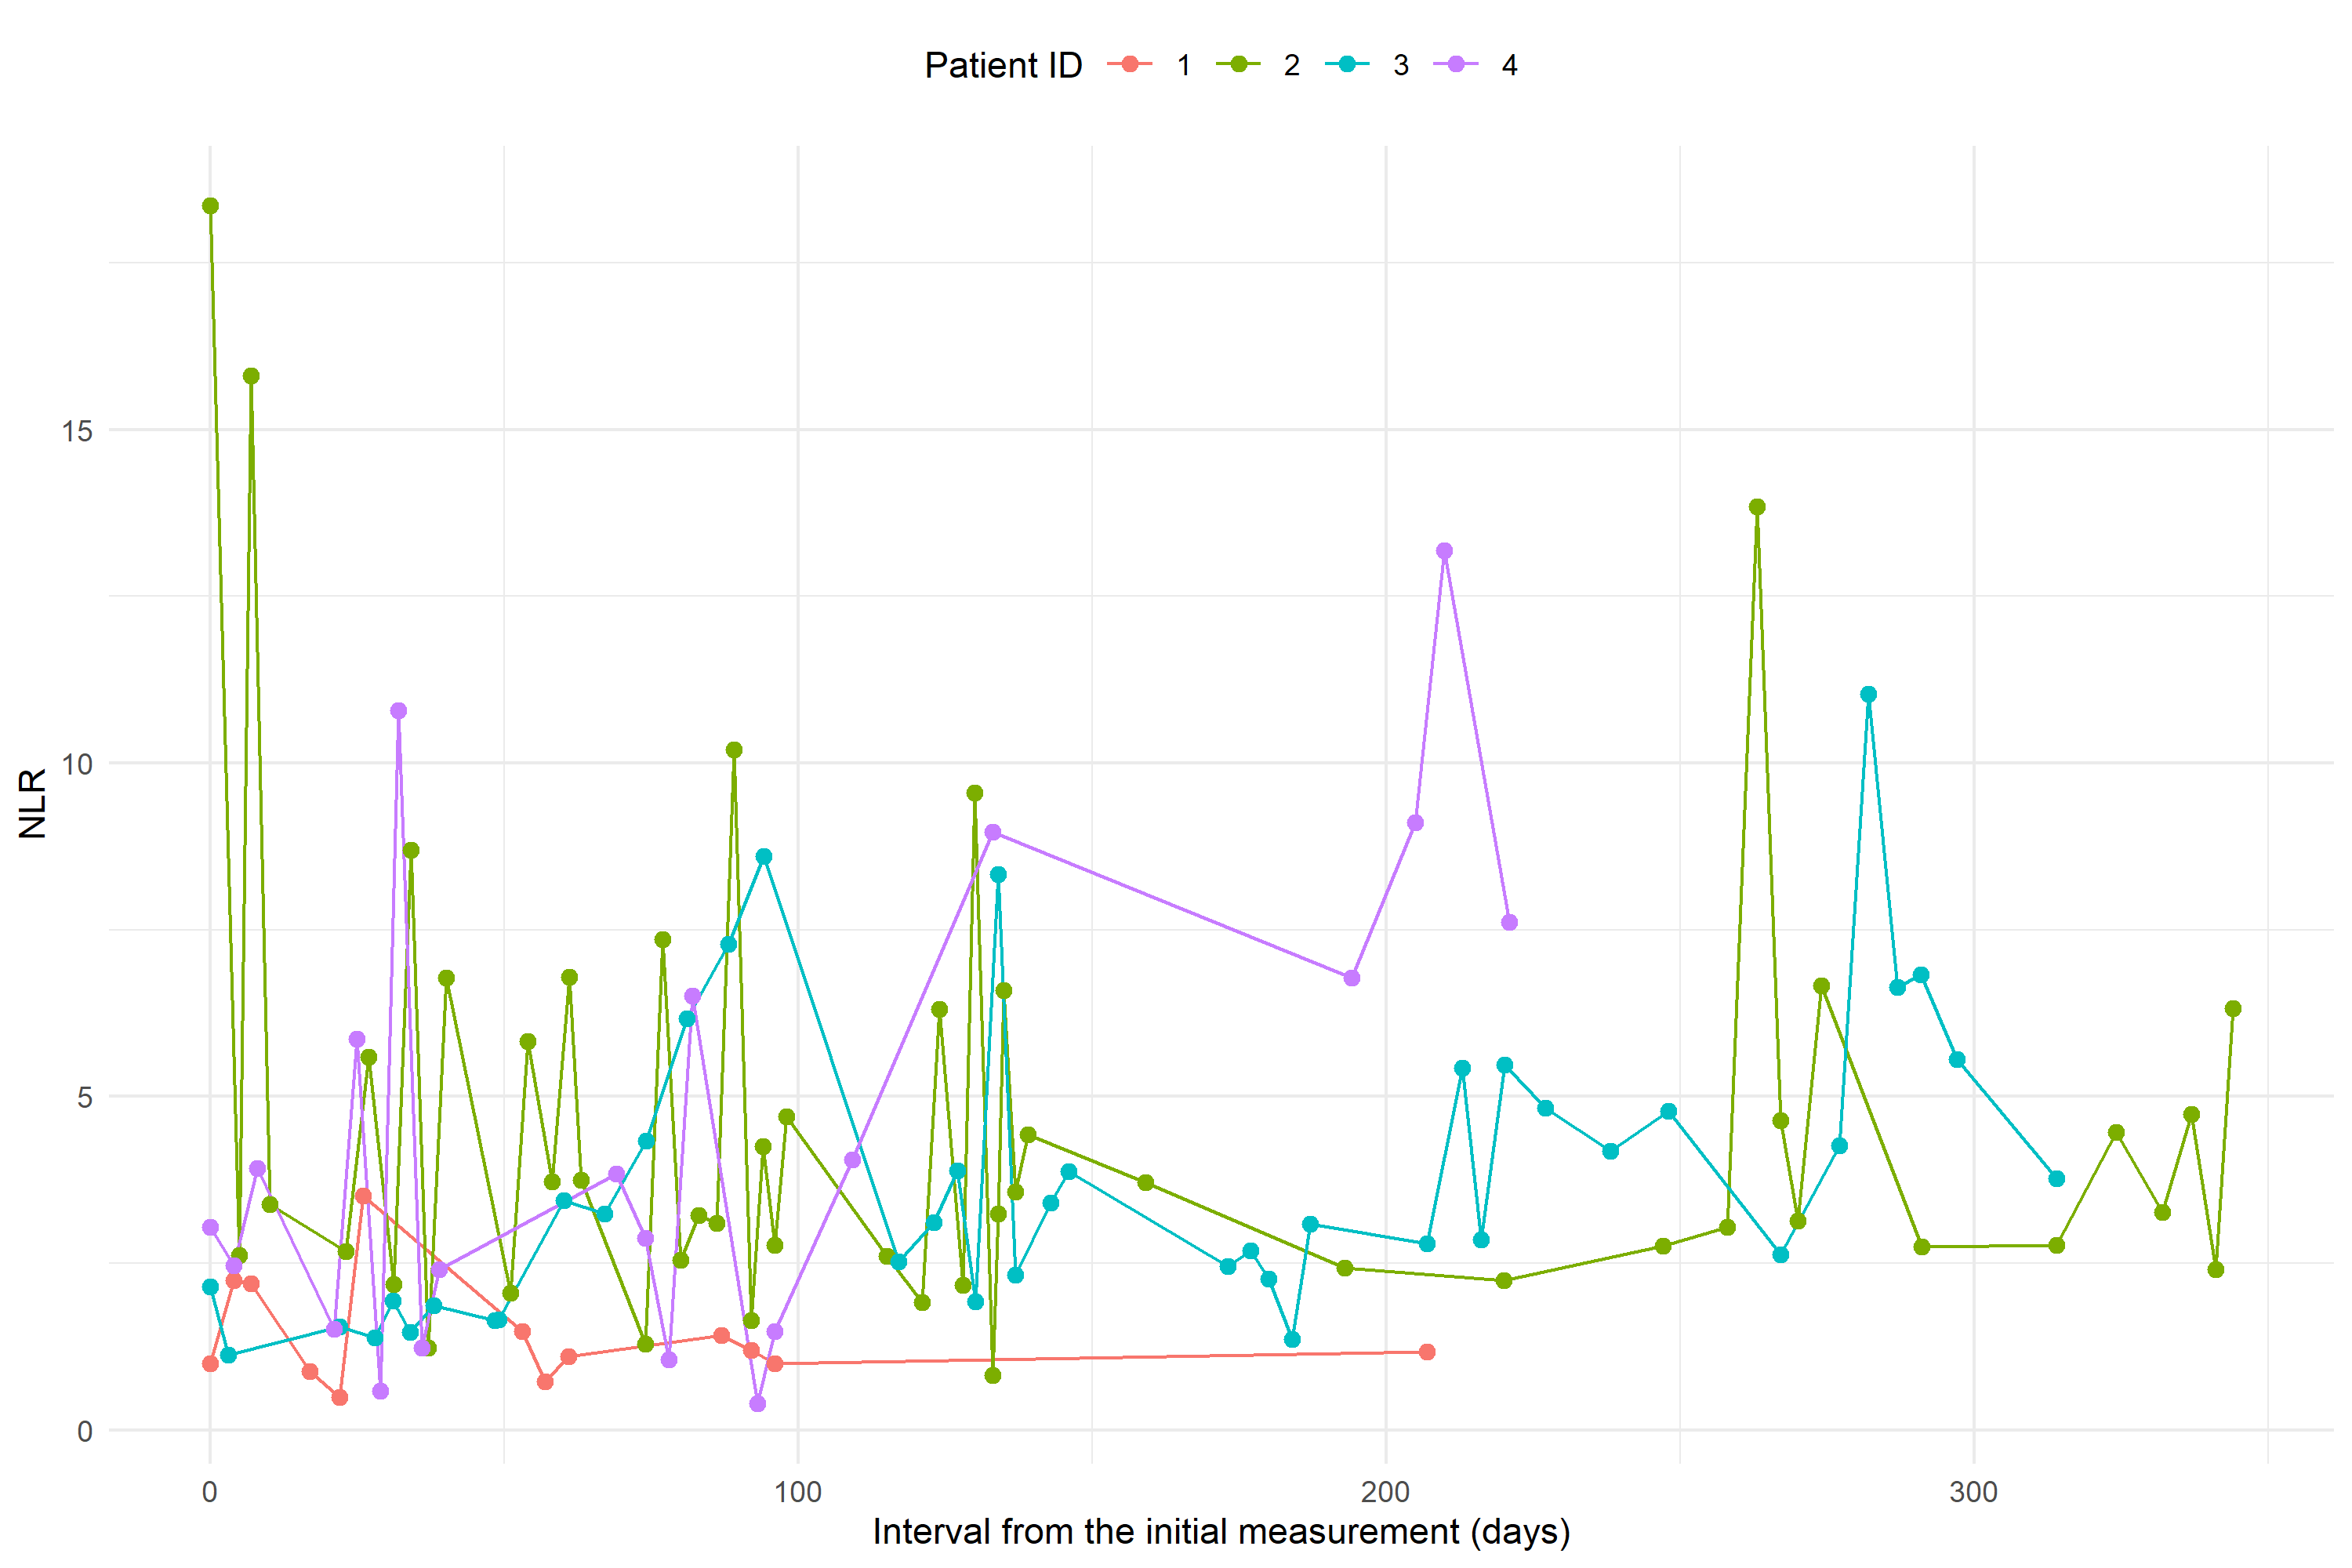


NLR: neutrophil to lymphocyte ratio.

Notes: Patient IDs were de-identified and converted to numerics (i.e., 1, 2, 3, 4).

**Figure S2:** Comparison of survival curves (end event: adverse cardiac events [ACEs]) in groups with different inflammation status.


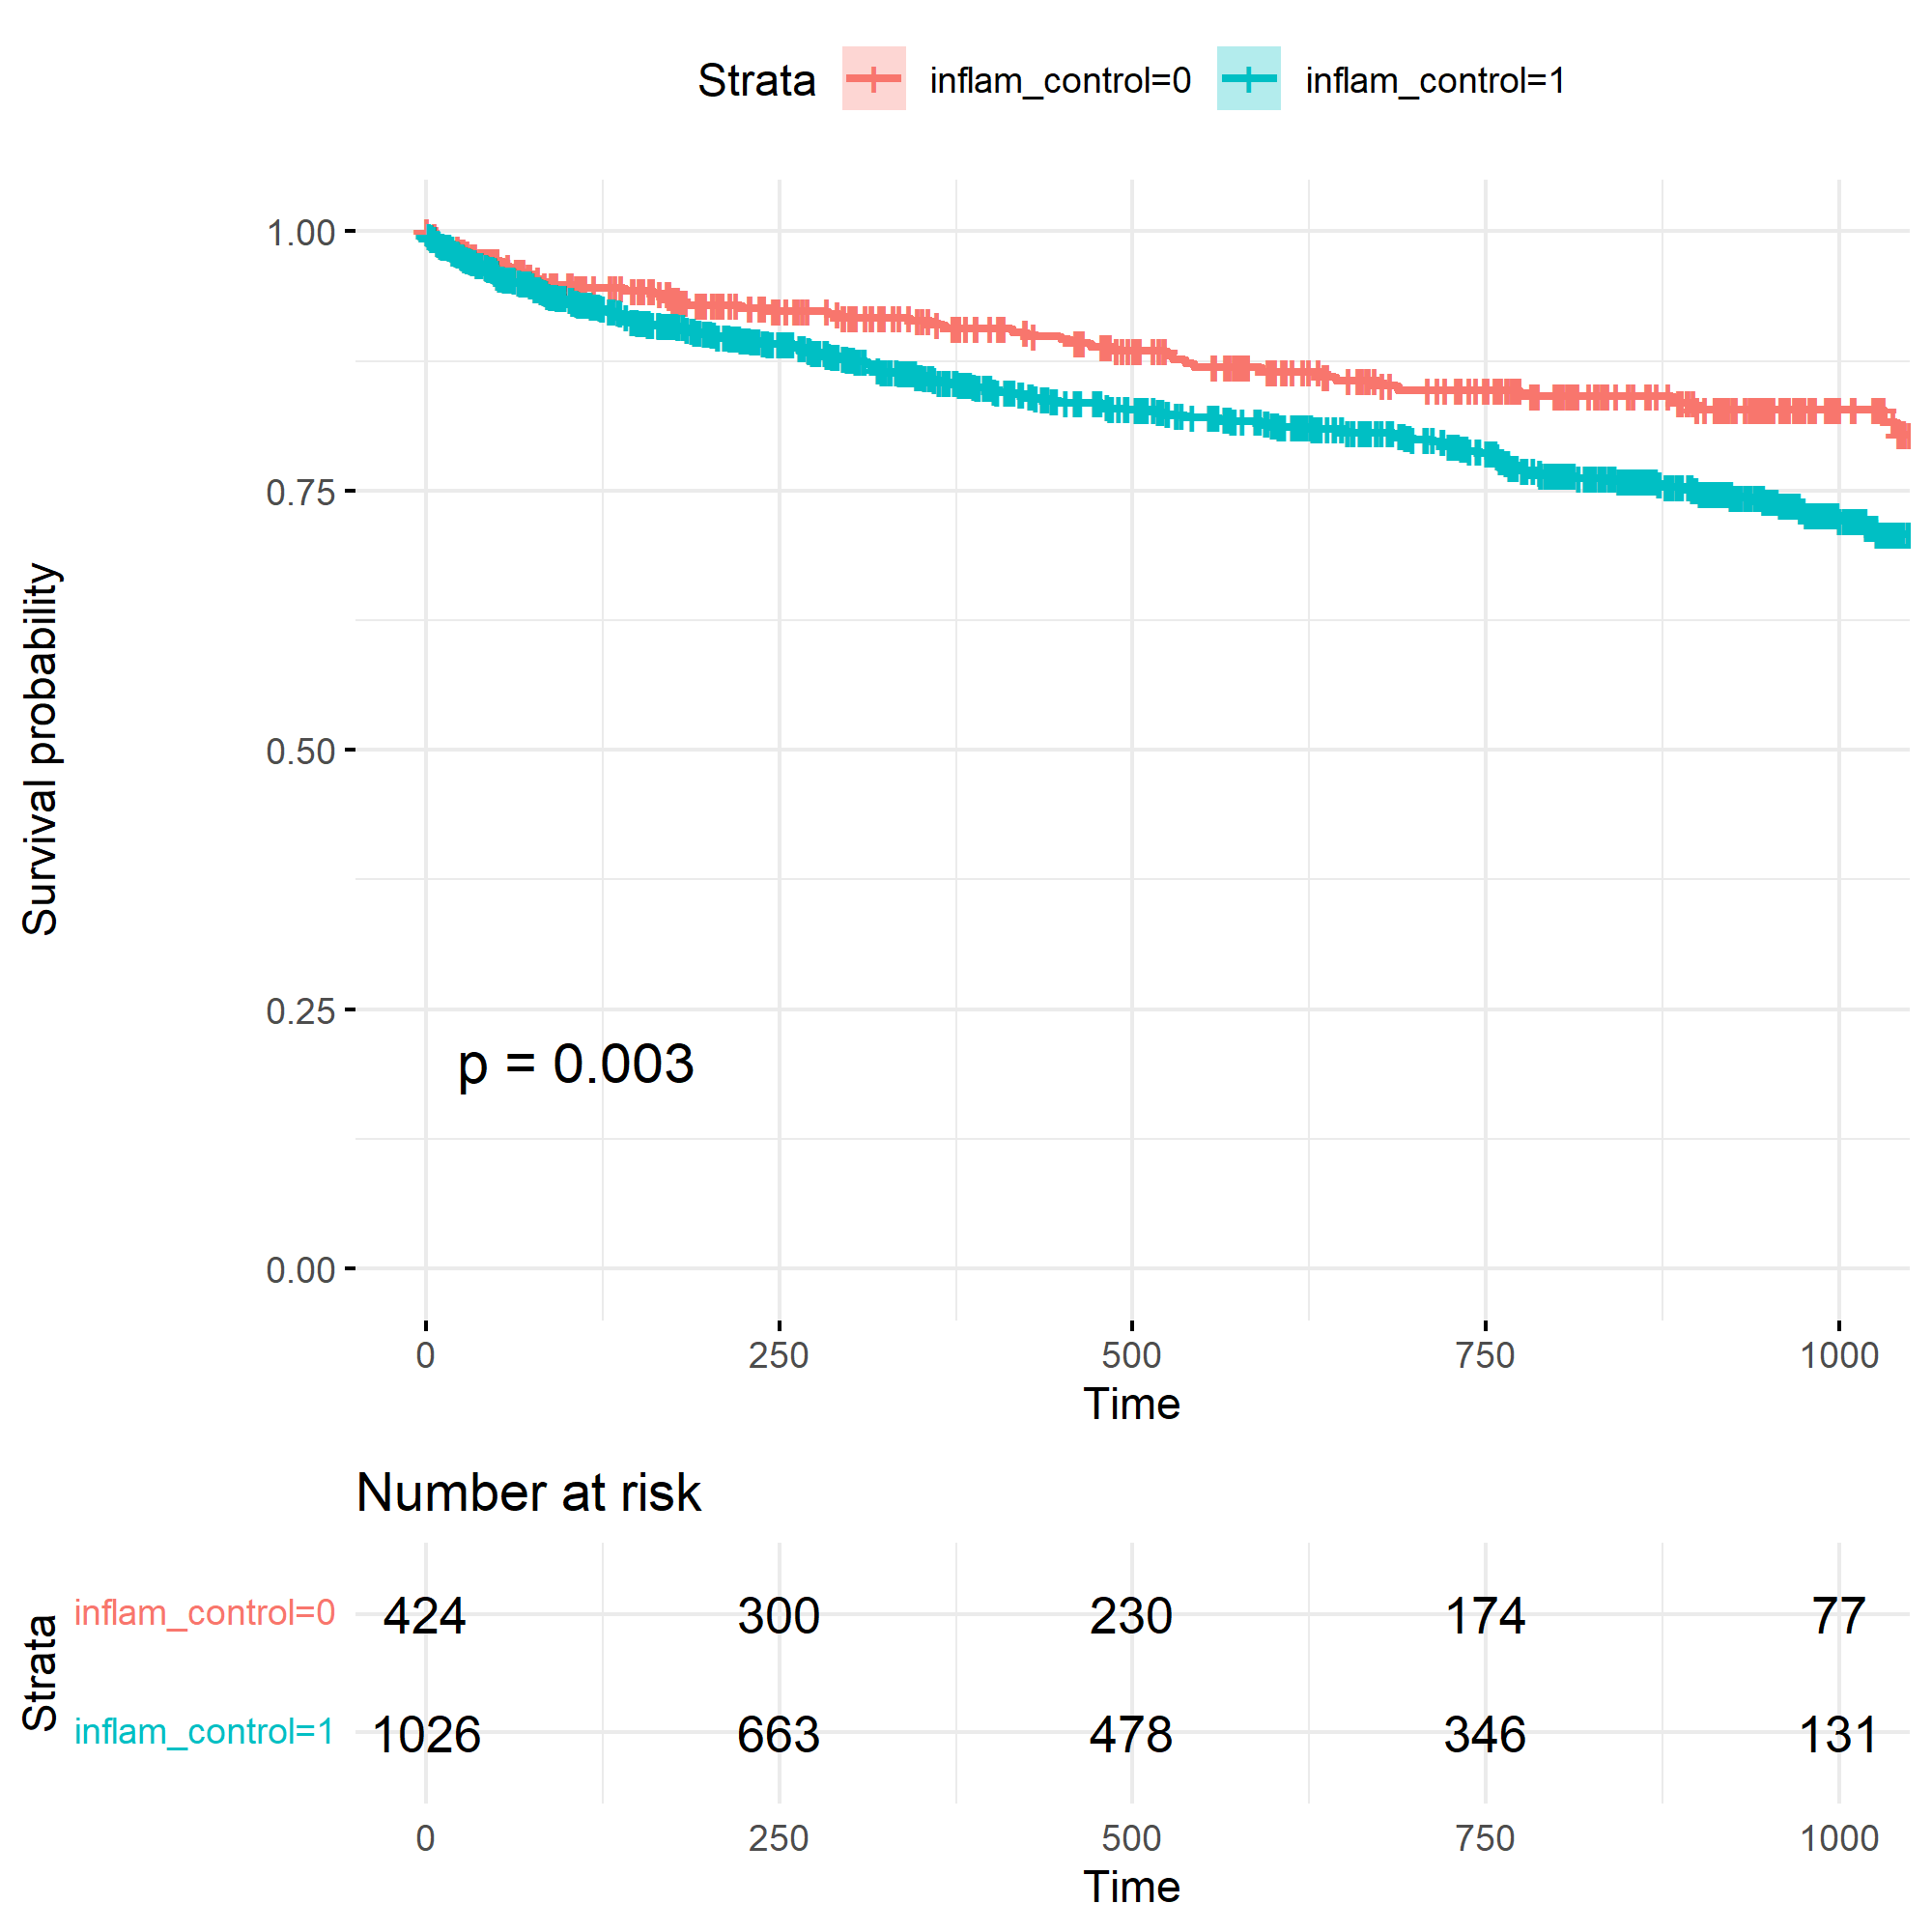


Inflam_control = 0 (well-controlled inflammation) vs. inflam_control = 1 (poorly controlled inflammation). End event: adverse cardiac events (ACEs).

*Survival curves start 1 year after the initial diagnosis of NSCLC.

**Tables**

**Table S1:** Distribution of the initial platinum-based compounds

| **NO** | **Drug Name** | **Frequency** |
| --- | --- | --- |
| 1 | Oxaliplatin Mannitol | 5 |
| 2 | Oxaliplatin | 15 |
| 3 | Cisplatin | 536 |
| 4 | Carboplatin | 185 |
| 5 | Lobaplatin | 89 |
| 6 | Nedaplatin | 125 |
| 7 | total | 955 |

**Table S2:** List of adverse cardiac events.

| **NO** | **Chinese Name** | **English Name** | **ICD-10 Code** |
| --- | --- | --- | --- |
| 1 | 冠状动脉粥样硬化 | Coronary Artery Atherosclerosis | I25.1 |
| 2 | 冠心病 | Coronary Heart Disease (CHD) | I25.9 |
| 3 | 缺血性心肌病 | Ischemic Cardiomyopathy | I25.5 |
| 4 | 冠状动脉性心脏病 | Coronary Artery Heart Disease | I25.9 |
| 5 | 缺血性心肌病 | Ischemic Cardiomyopathy | I25.5 |
| 6 | 心房颤动 | Atrial Fibrillation (AF) | I48.0 |
| 7 | 心绞痛 | Angina Pectoris | I20.9 |
| 8 | 慢性心功能不全 | Chronic Heart Failure (CHF) | I50.9 |
| 9 | 心脏病 | Heart Disease | I25.9 |
| 10 | 心梗 | Myocardial Infarction (MI) | I21.9 |
| 11 | 心房恶性肿瘤 | Malignant Tumor of the Atria | C32.0* |
| 12 | 心肌梗塞 | Myocardial Infarction (MI) | I21.9 |
| 13 | 心肌缺血 | Myocardial Ischemia | I25.2 |
| 14 | 心脏支架 | Cardiac Stent (Coronary Artery Stent) | Z95.5 |

*Atrial tumors, such as atrial myxomas, may be coded under this

**Table S3:** Sub-models of the causal mediation analysis

|  | **Dependent variable:** | |
| --- | --- | --- |
|  | **Max NLR** | **ACEs (0/1)** |
|  | **OLS**  **(model 1)** | **Logistic**  **(model 2)** |
| **Max NLR** |  | 0.019***  (0.006) |
| **plan** | 2.445***  (0.614) | 0.392**  (0.163) |
| **age** | 0.024  (0.040) | 0.031***  (0.010) |
| **sex** | 0.413  (0.578) | 0.062  (0.148) |
| **Baseline NLR** | 0.062  (0.073) | -0.022  (0.021) |
| **dm** | 0.308  (0.902) | 0.371*  (0.208) |
| **htn** | -0.496  (0.697) | 0.024  (0.174) |
| **Constant** | 7.260***  (2.569) | -4.034***  (0.667) |
| **Observations** | 1,450 | 1,450 |
| **R²** | 0.014 |  |
| **Adjusted R²** | 0.010 |  |
| **Log Likelihood** |  | -638.408 |
| **Akaike Inf. Crit.** |  | 1,292.815 |
| **Residual Std. Error** | 10.719 (df = 1443) |  |
| **F Statistic** | 3.484*** (df = 6; 1443) |  |

**Significance Levels**:* p < 0.1, ** p < 0.05, *** p < 0.01

The standard errors are provided in parentheses below each coefficient.

Abbreviations: NLR, neutrophil-to-lymphocyte ratio; DM, diabetes mellitus; htn, hypertension

Note: chd is zero across all patients and was thus omitted from the modeling process.

Plan: 1, platinum-based chemotherapy; 0, no platinum-based chemotherapy

Model 1: Association between all covariates (***X***) and maximum NLR (y)

Model 2: Association between all covariates, maximum NLR (***X***), and risk of ACEs (y)

**Table S4**. Sensitivity analysis results

|  | BMI Added  (N = 1188) | | Smoking Added  (N = 920) | | Smoking + BMI (Simultaneous Inclusion) (N = 920) | | Well-Controlled vs. Not  (N = 1450) | | Alternative Outcome Definition  (N = 1450) | |
| --- | --- | --- | --- | --- | --- | --- | --- | --- | --- | --- |
|  | **Estimate** | **p-value** | **Estimate** | **p-value** | **Estimate** | **p-value** | **Estimate** | **p-value** | **Estimate** | **p-value** |
| **ACME (control)** | 0.004917  (0.000800, 0.01) | 0.010 ** | 0.00441  (0.000065, 0.01) | 0.044 * | 0.00443  (0.000061, 0.01) | 0.044 * | 0.004869 (0.000353, 0.01) | 0.030 * | 0.00515 (0.00120, 0.01) | <2e-16 *** |
| **ACME (treated)** | 0.005996  (0.000923, 0.01) | 0.010 ** | 0.00532  (0.000071, 0.02) | 0.044 * | 0.00535  (0.000071, 0.02) | 0.044 * | 0.006312 (0.000400, 0.01) | 0.030 * | 0.00666 (0.00167, 0.02) | <2e-16 *** |
| **ADE (control)** | 0.038515  (-0.005313, 0.08) | 0.094 . | 0.0377  (-0.016, 0.08) | 0.166 | 0.0377  (-0.016, 0.08) | 0.166 | 0.049230 (0.009506, 0.09) | 0.018 * | 0.04946 (0.00791, 0.09) | 0.02 * |
| **ADE (treated)** | 0.039594  (-0.005590, 0.08) | 0.094 . | 0.0386  (-0.0166, 0.09) | 0.166 | 0.0386  (-0.0164, 0.09) | 0.166 | 0.050673 (0.009676, 0.09) | 0.018 * | 0.05097 (0.00816, 0.09) | 0.02 * |
| **Total Effect** | 0.044510  (-0.000660, 0.09) | 0.052 . | 0.043  (-0.00811, 0.09) | 0.106 | 0.043  (-0.0084, 0.09) | 0.106 | 0.055542 (0.013405, 0.10) | 0.010 ** | 0.05612 (0.01402, 0.10) | 0.01 ** |
| **Prop. Mediated (control)** | 0.110462  (-0.107411, 0.80) | 0.062 . | 0.102  (-0.508, 1.13) | 0.150 | 0.103  (-0.515, 1.07) | 0.146 | 0.087660 (0.003862, 0.34) | 0.040 * | 0.09177 (0.02042, 0.39) | 0.01 ** |
| **Prop. Mediated (treated)** | 0.134702  (-0.091885, 0.81) | 0.062 . | 0.124  (-0.461, 1.13) | 0.150 | 0.124  (-0.475, 1.07) | 0.146 | 0.113638 (0.005284, 0.37) | 0.040 * | 0.11875 (0.02933, 0.42) | 0.01 ** |
| **ACME (average)** | 0.005456  (0.000877, 0.01) | 0.010 ** | 0.00486  (0.000068, 0.01) | 0.044 * | 0.00489  (0.000071, 0.01) | 0.044 * | 0.005590 (0.000376, 0.01) | 0.030 * | 0.00591 (0.00144, 0.01) | <2e-16 *** |
| **ADE (average)** | 0.039054  (-0.005451, 0.08) | 0.094 . | 0.0382  (-0.0162, 0.08) | 0.166 | 0.0382  (-0.0161, 0.08) | 0.166 | 0.049951 (0.009544, 0.09) | 0.018 * | 0.05022 (0.00804, 0.09) | 0.02 * |
| **Prop. Mediated (average)** | 0.122582  (-0.099648, 0.80) | 0.062 . | 0.113  (-0.484, 1.13) | 0.150 | 0.114  (-0.495, 1.07) | 0.146 | 0.100649 (0.004573, 0.35) | 0.040 * | 0.10526 (0.02492, 0.41) | 0.01 ** |

Signif. codes: 0 ‘***’ 0.001 ‘**’ 0.01 ‘*’ 0.05 ‘.’ 0.1 ‘ ’ 1

Notes: Alternative definition/subset of outcomes (strictly cardiac-specific events): Exclude pulmonary embolism (PE) and focus only on direct cardiac pathology.
